# Supplementary material for: Quantifying spatial heterogeneity of chlorophyll fluorescence during plant growth and in response to water stress
Source: PubMed Central journal article supplement (PMC4394423; doi:10.1186/s13007-015-0067-5), 2015-03-26

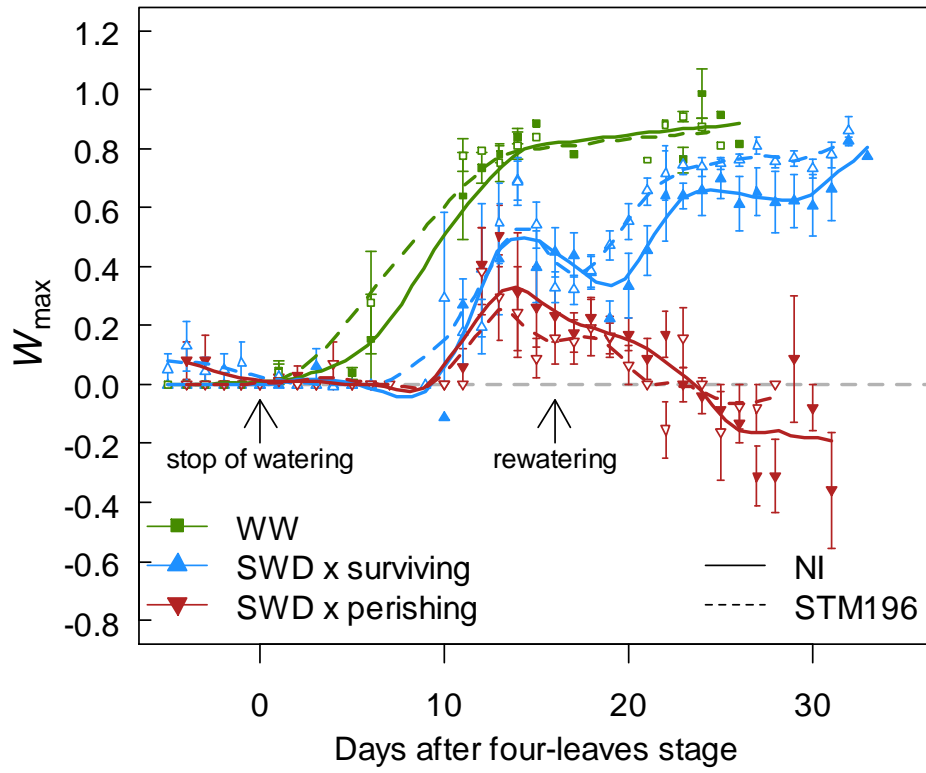

Supplement: 13007_2015_67_MOESM5_ESM.pdf [file 13007_2015_67_MOESM5_ESM.pdf]
