# Supplementary material for: Quantifying spatial heterogeneity of chlorophyll fluorescence during plant growth and in response to water stress
Source: PubMed Central journal article supplement (PMC4394423; doi:10.1186/s13007-015-0067-5), 2015-03-26
Supplement: 13007_2015_67_MOESM6_ESM.pdf [file 13007_2015_67_MOESM6_ESM.pdf]

|                                | Abbreviation | Methods                                              | Units     | Substrats  |       |           |           |
|--------------------------------|--------------|------------------------------------------------------|-----------|------------|-------|-----------|-----------|
|                                |              |                                                      |           | Compost N2 | Soil  | Mixture 1 | Mixture 2 |
| <b>Calcium</b>                 | Ca           |                                                      | % in soil | 1.95       | 17.21 | 17.11     | 12.69     |
| <b>Potassium</b>               | K            |                                                      | % in soil | 0.16       | 0.15  | 0.20      | 0.22      |
| <b>Magnesium</b>               | Mg           |                                                      | % in soil | 0.25       | 0.35  | 0.42      | 0.34      |
| <b>Phosphorus</b>              | P            |                                                      | % in soil | 0.08       | 0.067 | 0.093     | 0.063     |
| <b>Aluminum</b>                | Al           |                                                      | ppm       | 997        | 7486  | 6854      | 7934      |
| <b>Arsenic</b>                 | As           |                                                      | ppm       | < 0.1      | < 0.1 | < 0.1     | < 0.1     |
| <b>Boron</b>                   | B            |                                                      | ppm       | 11         | 22    | 26        | 22        |
| <b>Barium</b>                  | Ba           | Dry Ash analysed by inductively coupled plasma (ICP) | ppm       | 183        | 732   | 746       | 770       |
| <b>Cadmium</b>                 | Cd           |                                                      | ppm       | < 0.1      | < 0.1 | < 0.1     | < 0.1     |
| <b>Chromium</b>                | Cr           |                                                      | ppm       | 16         | 18    | 28        | 29        |
| <b>Copper</b>                  | Cu           |                                                      | ppm       | 14         | 33    | 21        | 23        |
| <b>Iron</b>                    | Fe           |                                                      | ppm       | 835        | 5123  | 6353      | 7070      |
| <b>Manganese</b>               | Mn           |                                                      | ppm       | 81         | 361   | 466       | 467       |
| <b>Molybdenum</b>              | Mo           |                                                      | ppm       | < 0.1      | < 0.1 | < 0.1     | < 0.1     |
| <b>Sodium</b>                  | Na           |                                                      | ppm       | 2029       | 766   | 1483      | 1480      |
| <b>Nickel</b>                  | Ni           |                                                      | ppm       | 78         | 518   | 551       | 760       |
| <b>Lead</b>                    | Pb           |                                                      | ppm       | < 0.1      | < 0.1 | < 0.1     | < 0.1     |
| <b>Zinc</b>                    | Zn           |                                                      | ppm       | 31         | 46    | 45        | 43        |
| <b>Ammonium-Nitrogen</b>       | NH4-N        | Saturated paste extraction                           | ppm       | 0.2        | 0.1   | 0.2       | 0.3       |
| <b>Nitrate-Nitrogen</b>        | NO3-N        | analyzed                                             | ppm       | 114        | 56    | 216       | 428       |
| <b>Nitrogen</b>                | N            | Dry combustion                                       | % in soil | 1.10       | 0.11  | 0.18      | 0.24      |
| <b>Carbon</b>                  | C            |                                                      | % in soil | 40.36      | 7.27  | 10.48     | 9.75      |
| <b>Electrical Conductivity</b> | EC           | Solubridge                                           | mmhos/cm  | 2.7        | 1.2   | 2.5       | 5.1       |
| <b>Soluble Salts</b>           | SS           |                                                      | ppm       | 1910       | 868   | 1736      | 3559      |
